# Supplementary material for: Exclusive Breastfeeding Practices; Coping Strategies by Working Mothers in Accra, Ghana
Source: Research Square preprint supplement (doi:10.21203/rs.3.rs-8565612/v1), 2026-02-17
Supplement: Supplementary file 1 [file 9042c430b2d984f29f9d1c94.docx]

# **APPENDIX II1: INTERVIEW GUIDE**

**TOPIC: Exclusive Breastfeeding Practices and Coping Strategies Adopted by Lactating Working Mothers in the Korle Klottey Municipal, Accra, Ghana.**

**Section A: Background Information**

1. Age?................................................
2. Educational Level? ………………….
3. Marital Status?..........................................
4. Occupation?......................................................
5. Position/Rank/Level?...............................................

**Section B: Interview Guide on Exclusive Breastfeeding Practices and Coping Strategies Adopted by Lactating Working Mothers.**

1. Have you ever heard about exclusive breastfeeding? When did you first hear of exclusive breastfeeding (before or after pregnancy)?
2. Do you practice exclusive breastfeeding? Probe. Why or why not?
3. How long do you think a mother should breastfeed her baby on only breast milk before introducing other foods? Why is it so?
4. What is your perspective on the importance of exclusively breastfeeding?
5. How do you handle expressing and storing breast milk at the workplace?
6. What challenges have you faced in trying to exclusively breastfeed your baby while working?
7. What coping mechanisms have you found effective in balancing your job responsibilities and caring for your baby?
8. How does the workplace culture influence your ability to maintain exclusive breastfeeding practices?
9. How have you coped with these challenges?
10. Based on your experiences, what recommendations do you have for employers or policymakers to better support lactating working mothers?
