# Supplementary material for: Exclusive Breastfeeding Practices; Coping Strategies by Working Mothers in Accra, Ghana
Source: Research Square preprint supplement (doi:10.21203/rs.3.rs-8565612/v1), 2026-02-17
Supplement: Supplementary file 2 [file b619330680b6f6ff55e76029.docx]

# **APPENDIX I: INFORMED CONSENT**

**STUDY TITLE:** **Exclusive Breastfeeding Practices and Coping Strategies Adopted by Lactating Working Mothers in the Korle Klottey Municipal, Accra, Ghana.**

My name is ……………………………………. I am a Research Assistant representing Daniel Aboagye, a student of the University of Ghana School of Public Health. We are conducting a survey about Exclusive Breastfeeding Practices and Coping Strategies Adopted by Lactating Working Mothers in the Korle Klottey Municipal Area, Accra, Ghana. The purpose of the study is to investigate breastfeeding practices and coping mechanisms of lactating working mothers to navigate breastfeeding practice as professionals. Your participation in this study would be greatly appreciated as you are considered someone with knowledge and expertise in the study topic. As you consider participating, please take note of the following:

**Voluntary participation:** Participating in this study is completely voluntary, and you can choose to stop at any time without any negative consequences.

**Compensation:** There is no compensation for taking part in the study, except for a drink and biscuits worth GH¢ 20.00 given as a token of appreciation for your time.

**Confidentiality:** Participant information will be stored on a password-protected computer. Recordings and transcriptions will be kept in a locked location, with access restricted to only the Principal Investigator and the Ghana Health Service Ethics Review Committee (GHS ERC) for monitoring purposes.

**Privacy:** Data collection will be done at convenient places to ensure privacy. In ensuring anonymity, participants will identify with codes.

**Risks:** The research posed no risk.

# **APPENDIX II: CONSENT FORM**

PARTICIPANTS’ STATEMENT

I acknowledge that I have read or have had the purpose and contents of the Participants’ Information Sheet read and all questions satisfactorily explained to me. I fully understand the contents and any potential implications as well as my right to change my mind (withdraw from the research) even after I have signed this form. I voluntarily agree to be part of this research.

Name of Participant………………………………………………………………………...

Participants’ Signature ……………………...OR Thumb Print……………………………

Date: ………………………………….
